# Supplementary material
Source: PubMed Central journal article supplement (PMC2897586)

1 **Supplementary information**

2  
3 **Supplementary materials and methods**

4  
5 **Table I. List of strains used in this study**

| 6 <b>Strain</b>        | 7 <b>Genotype</b>                                                                                                  | 8 <b>Reference</b> |
|------------------------|--------------------------------------------------------------------------------------------------------------------|--------------------|
| 9 A2                   | $h^+$ <i>ade6-M216 his3-D1 leu1 1-32 ura4-D</i>                                                                    | lab stock          |
| 10 972                 | $h^-$                                                                                                              | lab stock          |
| 11 <i>oca2Δ</i>        | $h^+$ <i>ade6-M216 his3-D1 leu1 1-32 ura4-D18</i><br><i>oca2Δ::kanMX6</i>                                          | lab stock          |
| 12 <i>oca2-HA</i>      | $h^+$ <i>ade6-M216 his3-D1 leu1 1-32 ura4-D18</i><br><i>oca2-HA::kanMX6</i>                                        | lab stock          |
| 13 <i>oca2Δ-20</i>     | $h^-$ <i>oca2Δ::kanMX6</i>                                                                                         | this study         |
| 14 <i>cha4Δ</i>        | $h^+$ <i>ade6-M216 his3-D1 leu1 1-32 ura4-D18</i><br><i>cha4Δ::kanMX6</i>                                          | this study         |
| 15 <i>ago1Δ</i>        | $h^+$ <i>ade6-M216 his3-D1 leu1 1-32 ura4-D18</i><br><i>ago1 Δ::kanMX6</i>                                         | this study         |
| 16 <i>hat1Δ</i>        | $h^+$ <i>ade6-M216 his3-D1 leu1 1-32 ura4-D18</i><br><i>hat1 Δ::kanMX6</i>                                         | this study         |
| 17 <i>clr6-1</i>       | $h^-$ <i>clr6-1</i>                                                                                                | (S4)               |
| 18 <i>clr4Δ</i>        | $h^+$ <i>clr4::hph<sup>+</sup> otr1R(SphI)::ade6-M210</i>                                                          | Robin Allshire     |
| 19 <i>oca2Δ clr6-1</i> | $h^?$ <i>ade6-M216 leu1 1-32 oca2 Δ::kanMX6 clr6-1</i>                                                             | this study         |
| 20 wt                  | $h^+$ <i>leu1-32 ade6-M216 ura4-D18</i><br><i>imr1R(NcoI)::ura4<sup>+</sup> oriI</i>                               | Marc Buehler       |
| 21 <i>rrp6Δ</i>        | $h^+$ <i>leu1-32 ade6-M216 ura4-D18</i><br><i>imr1R(NcoI)::ura4<sup>+</sup> oriI rrp6Δ::Nat<sup>R</sup></i>        | Marc Buehler       |
| 22 <i>Flag-ago1</i>    | $h^+$ <i>otr1R(SphI)::ura4<sup>+</sup> ura4-DS/E leu1-32</i><br><i>ade6-M210 Nat<sup>R</sup>-nmt1-3xFlag::ago1</i> | (S1)               |

30  
31  
32  
33 **Table II. Genes used in this study**

| 34 <b>Name</b> | 35 <b>Systematic name</b> |
|----------------|---------------------------|
| 36 <i>oca2</i> | SPCC1020.10               |
| 37 <i>ppk8</i> | SPAC22G7.08               |
| 38 <i>cha4</i> | SPBC1683.13c              |
| 39 <i>hat1</i> | SPAC139.06                |
| 40 <i>prw1</i> | SPAC29A4.18               |
| 41 <i>perl</i> | SPAP7G5.06                |
| <i>put4</i>    | SPAC869.10                |

1 **Table III. List of primers used in this study**

| 2 Name     | sequence/reference                          | purpose                   |
|------------|---------------------------------------------|---------------------------|
| 3 1F       | TGTGTCTCGGCTTACCCTTC                        | ChIP <i>perl</i>          |
| 4 1R       | GCGGAAAGAGACGGATAACA                        | ChIP <i>perl</i> , 5'RACE |
| 5 1BR      | GTGCAATCTACTAGCAACCAAG                      | 5'RACE                    |
| 6 2F       | GCTCTCCAAGTGCCAGTTTC                        | ChIP <i>perl</i>          |
| 7 2R       | GCCGCACAATATGGATAAGG                        | ChIP <i>perl</i>          |
| 8 3F       | CGCATCTTGCATTATTTACC                        | ChIP <i>perl</i>          |
| 9 3R       | AAACGATTGGGAAACACTCG                        | ChIP <i>perl</i> , 5'RACE |
| 10 4F      | GTCGCCAGATCGCTCTATTG                        | ChIP <i>perl</i>          |
| 11 4R      | TGGGATGAATGTCGAAAACA                        | ChIP <i>perl</i> , 5'RACE |
| 12 5F      | GCGGTGGTGTTCCTACTGAT                        | ChIP, qRT-PCR             |
| 13 5R      | GCACGAGGGAGAGACTTTTG                        | ChIP, qRT-PCR             |
| 14 6F      | TGATTTAGACACGGGACTTCG                       | ChIP <i>perl</i>          |
| 15 6R      | CAAAGAGATTGCCAAATCCA                        | ChIP <i>perl</i>          |
| 16 7F      | CGTTGTAAGTTTATATGTTGAAGCA                   | ChIP <i>perl</i>          |
| 17 7R      | TGCGAATGCAAGGCATAATA                        | ChIP <i>perl</i>          |
| 18 8F      | ATATAATGTTGAGCTCCTTGTTAGC                   | ChIP <i>perl</i>          |
| 19 8R      | TGAGCTTGATAAGGCGGTCT                        | ChIP <i>perl</i>          |
| 20 Put4BF  | AAAAAGGCGTTGCAGTATGA                        | ChIP <i>put4</i>          |
| 21 Put4BR  | TTTCTCCGTACTIONCTTTTCAACG                   | ChIP <i>put4</i>          |
| 22 Adh1PF  | CTTCCGCGTCTCATTGGT                          | ChIP <i>adh1</i>          |
| 23 Adh1PR  | TTGCTTAAAGAAAAGCGAAGG                       | ChIP <i>adh1</i>          |
| 24 dhF     | (20)                                        | ChIP <i>dh</i>            |
| 25 dhR     | (20)                                        | ChIP <i>dh</i>            |
| 26 Put4F   | ACATGATCGCTTGGGTTTTTC                       | qRT-PCR <i>put4</i>       |
| 27 Put4R   | TTAGGGATGTTACGCCTTGG                        | qRT-PCR <i>put4</i>       |
| 28 Adh1F   | CGTATTGACTCTATCGAGGCTCTT                    | qRT-PCR <i>adh1</i>       |
| 29 Adh1R   | CTTGGAAGGTCCAAGACGA                         | qRT-PCR <i>adh1</i>       |
| 30 RT-PCR1 | (50)                                        | RT-PCR <i>dh</i>          |
| 31 RT-PCR2 | (50)                                        | RT-PCR <i>dh</i>          |
| 32 ACTF    | (50)                                        | RT-PCR <i>act1</i>        |
| 33 ACTR    | (50)                                        | RT-PCR <i>act1</i>        |
| 34 ORFT7   |                                             | Northern <i>perl</i>      |
| 35         | TAATACGACTCACTATAGGGAGAGCGGTGGTGTTCCTACTGAT |                           |
| 36 ORFT3   |                                             | Northern <i>perl</i>      |
| 37         | AATTAACCCTCACTAAAGGGAGACCAACACGAAGGGAGAGGTA |                           |
| 38 US2T7   |                                             | Northern <i>perl</i>      |
| 39         | TAATACGACTCACTATAGGGAGAGCCCATTCCCATTCAATTTT |                           |
| 40 US2T3   |                                             | Northern <i>perl</i>      |
| 41         | AATTAACCCTCACTAAAGGGAGAATGTTTGAGCGCGTGTATGT |                           |
| 42 US1T7   |                                             | Northern <i>perl</i>      |
| 43         | TAATACGACTCACTATAGGGAGACTGCTGCAAACCTTTGGTTG |                           |
| 44 US1T3   |                                             | Northern <i>perl</i>      |
| 45         | AATTAACCCTCACTAAAGGGAGATTAGTTACCCTATTTGGAAG |                           |
| 46 RplAT7  |                                             | Northern <i>rpl1002</i>   |

1 TAATACGACTCACTATAGGGAGAGCTCGTATCTGTGCCAACAA  
2 RplAT3 Northern *rpl1002*  
3 AATTAACCCTCACTAAAGGGAGAGTAGCAACCGTCGGGAATAA  
4 RplBT7 Northern *rpl1002*  
5 TAATACGACTCACTATAGGGAGATGGTGTGGATGAATCGGTA  
6 RplBT3 Northern *rpl1002*  
7 AATTAACCCTCACTAAAGGGAGACGTGGAAGTAGATGCGGAGT  
8 Adh1T7 Northern *adh1*  
9 TAATACGACTCACTATAGGGAGATTCAAGGTGACTGGCCTCTT  
10 Adh1T3 Northern *adh1*  
11 AATTAACCCTCACTAAAGGGAGACAAGGCACGATAGCAAGTGA  
12 Prw1FT7 *in vitro* translation  
13 GTGATAACTACTAATACGACTCACTATAGGGAGAATGGC  
14 TGTATCAGCTGTTC  
15 Prw1R *in vitro* translation  
16 Cha4FT7 *in vitro* translation  
17 GTGATAACTACTAATACGACTCACTATAGGGAGAAT  
18 GCAAATGAAACCCCGAC  
19 Cha4R *in vitro* translation  
20 Hat1F pBS-*hat1*  
21 Hat1R pBS-*hat1*  
22 Mis16F pBS-*mis16*  
23 Mis16R pBS-*mis16*  
24 Ago1F pBS-*ago1*  
25 Ago1R pBS-*ago1*  
26 P14 pGEX4T1-*oca2*  
27 P15 pGEX4T1-*oca2*  
28 Hat1KanF *hat1Δ*  
29 GAGCTAGAAATCTATATAATAGTAAATATTTTTTAATAA  
30 TAACAGGTGTAGCACGTGAAAGCGGATCCCCGGGTAAATTA  
31 Hat1KanR *hat1Δ*  
32 TAAATTTTGGAAAAAGCAGTTCATTATGAGGAATTGTTTGA  
33 ATTTTATAAGGTGCCTTTGAATTCGAGCTCGTTTAAAC  
34  
35  
36  
37

### 38 Kinase assays using recombinant proteins

39 For expression of Oca2-His<sub>6</sub> in Sf21 insect cells, a C-terminal His<sub>6</sub>-tag was first  
40 introduced into pGEX4T1-Oca2 by PCR with primers P16 and P17, followed by cloning  
41 of the Oca2-His<sub>6</sub> ORF into pTriEx1 (Novagen) using *EcoRV* and *SmaI* sites. Sf21 insect

1 cells were transfected with pTriEx1-Oca2-His<sub>6</sub> according to manufacturers instructions  
2 and the viral titer amplified over 3 rounds. To induce protein expression of Oca2-His<sub>6</sub>,  
3 500 ml of Sf21 cells were transfected with 5 ml of viral supernatant and incubated for 4  
4 days at 27°C. Cells were resuspended in lysis buffer (20mM Tris-HCl pH 8.0, 10%  
5 glycerol, 200mM KCl, 0.01% NP40) containing complete protease inhibitor cocktail  
6 (Roche) and lysed by sonication on ice. After centrifugation the supernatant was  
7 incubated with Ni-NTA beads (Qiagen) for 1 hr at 4°C. Beads were washed twice with 20  
8 bed volumes of lysis buffer, once with 5 bed volumes of lysis buffer containing 500mM  
9 NaCl, once with 5 bed volumes of lysis buffer containing 20mM Imidazole and once with  
10 5 bed volumes of lysis buffer. Oca2-His<sub>6</sub> was eluted with elution buffer (25mM HEPES  
11 pH 7.6, 10% glycerol, 100mM KCl, 250mM Imidazole). Purified recombinant proteins  
12 were incubated in kinase buffer (25 mM HEPES pH 7.6, 10% glycerol, 30 mM KCl, 10  
13 mM MgCl<sub>2</sub>, 1 mM DTT) containing 0.05 mM ATP and 0.5 µl <sup>32</sup>P-ATP for 1hr at 30°C.  
14 Proteins were precipitated with TCA, resolved by SDS-PAGE and stained with  
15 Coomassie brilliant Blue. Dried gels were subjected to autoradiography.

16

### 17 **PepChip Kinase microarray**

18 Two separate PepChip kinase arrays (Pepscan Systems) were incubated with 100ng  
19 baculoexpressed Oca2-His<sub>6</sub> under *in vitro* phosphorylation conditions. Slides were  
20 washed, dried and exposed on a phosphoimager screen. Both slides gave similar results  
21 and the 30 strongest signals were analysed. Amino acid sequences of the corresponding  
22 peptides were compared by eye to define an Oca2 phosphorylation consensus motif.

23

## 1 **Supplementary References**

- 2 S1 **Buker, S. M., Iida, T. , Bühler, M., Villén, J. Gygi, S.P., Nakayama, J.-**  
3 **I. and D. Moazed.** 2007. Two different Argonaute complexes are required  
4 for siRNA generation and heterochromatin assembly in fission yeast.  
5 Nature Struct Mol Biol **14**: 200 – 207.
- 6 S2 **Irvine, D. V., M. Zaratiegui, N. H. Tolia, D. B. Goto, D. H. Chitwood,**  
7 **M. W. Vaughn, L. Joshua-Tor, and R. A. Martienssen.** 2006.  
8 Argonaute slicing is required for heterochromatic silencing and spreading.  
9 Science **313**:1134-7.
- 10 S3 **Win, T. Z., A. L. Stevenson, and S. W. Wang.** 2006. Fission yeast Cid12  
11 has dual functions in chromosome segregation and checkpoint control.  
12 Mol Cell Biol **26**:4435-47.
- 13 S4 **Wiren, M., R. A. Silverstein, I. Sinha, J. Walfridsson, H. M. Lee, P.**  
14 **Laurenson, L. Pillus, D. Robyr, M. Grunstein, and K. Ekwall.** 2005.  
15 Genomewide analysis of nucleosome density histone acetylation and  
16 HDAC function in fission yeast. EMBO J **24**:2906-18.

## 19 **Supplementary Figure Legends**

### 20 **Figure S1**

21 (A) Oca2 has kinase activity *in vitro*. 30ng of baculo-expressed Oca2-His<sub>6</sub> were  
22 incubated either alone (lane 1) or with increasing amounts (200, 400, 800 ng) of MBP  
23 (Upstate; lanes 2-4) and proteins were analysed on 18% SDS-PAGE. Lane 5 contains 800

1 ng of MBP alone. (B) Oca2 phosphorylates serines and threonines surrounded by basic  
2 amino acids. A peptide micro-array containing 1400 peptides with known  
3 phosphorylation sites was incubated with recombinant Oca2-His<sub>6</sub> under *in vitro* kinase  
4 conditions followed by exposure on a phosphoimager screen. Amino acid sequence  
5 analysis of phosphorylated peptides from two independent experiments gave a consensus  
6 phosphorylation motif for Oca2 (shown below). (C) Oca2 is a phosphoprotein. Whole  
7 cell extracts prepared from *HA-oca2* cells was bound to HA-beads. After washing the  
8 beads with lysis buffer proteins were incubated with alkaline phosphatase (AP, lane 3),  
9 shrimp phosphatase (SP, lane 4) or buffer alone (mock, lane 2). Lane 1: untreated *HA-*  
10 *oca2* whole cell extract. Proteins were eluted with SDS sample buffer and analysed by  
11 Western blotting.

12

### 13 **Figure S2**

14 (A) *oca2Δ*, *cha4Δ* and *ago1Δ* cells are rapamycin resistant. Wt, *oca2Δ*, *cha4Δ* and *ago1Δ*  
15 cells were grown in YE, diluted into EMM with ammonia containing 0.3 μM Rapamycin  
16 or vehicle, and OD600 was measured at the indicated time points. (B) 5' extended  
17 transcripts of *per1* are rapamycin sensitive. Northern Blot analysis of total RNA isolated  
18 from wild type, *oca2Δ* and *cha4Δ* cells grown in EMM medium containing ammonia and  
19 rapamycin (even numbered lanes) or vehicle alone (uneven numbered lanes). (A)  
20 Hybridization was with probes against the ORF (Probe ORF, left) and upstream regions  
21 of *per1* (probe US2, middle; probe US1 right). (B) Same Northern blot as in (A)  
22 hybridized with a probe against *adh1* ORF.

23

1 **Figure S3**

2 Northern blot analysis of the ribosomal protein gene *rpl1002* located upstream of *per1*.  
3 Total RNA was isolated from wt and *oca2Δ* grown in EMM medium containing either  
4 ammonia or proline. Northern blots were probed with single-stranded RNA probes  
5 specific for sense transcripts mapping to the ORF (probe A) or immediately downstream  
6 of *rpl1002* (Probe B) and to the ORF of *adh1*.

7

8 **Figure S4**

9 5'RACE of *per1* transcripts. Total RNA was reverse transcribed using random hexamers,  
10 and cDNA was amplified with two nested PCR reactions. The *per1* locus is shown  
11 schematically as a black line with the *per1* ORF indicated with a white arrow and the  
12 positions of the ChIP primers and Northern probes indicated with black boxes. The  
13 5'RACE products are shown as grey boxes with the nested 5' RACE primers indicated by  
14 duplicated black arrows.

15

16 **Figure S5**

17 H3 ChIP of wt and *oca2Δ* cells grown in EMM medium containing either ammonia or  
18 proline. The positions of the PCR primers across *per1* are indicated. ChIP signal values  
19 are expressed as % of input DNA corrected for the no antibody control. The data shown  
20 represent the average and SEM of three independent experiments.

21

22 **Figure S6**

- 1 Northern blot analysis of *per1* in strains lacking *snf22*. Total RNA was isolated from
- 2 *snf22Δ* cells grown in EMM medium containing either NH<sub>4</sub> or proline and analysed
- 3 using single-stranded RNA probes mapping to the ORF of *per1*.



**Figure S1**

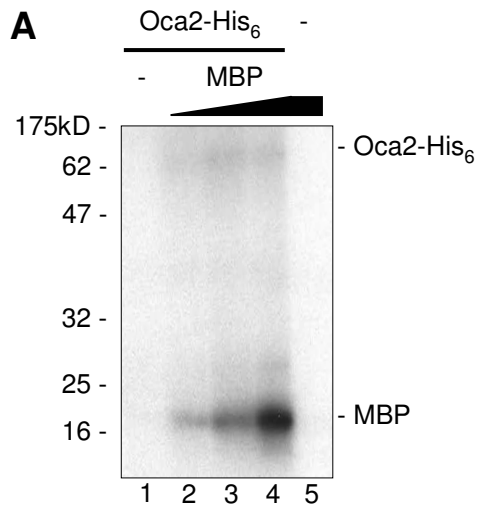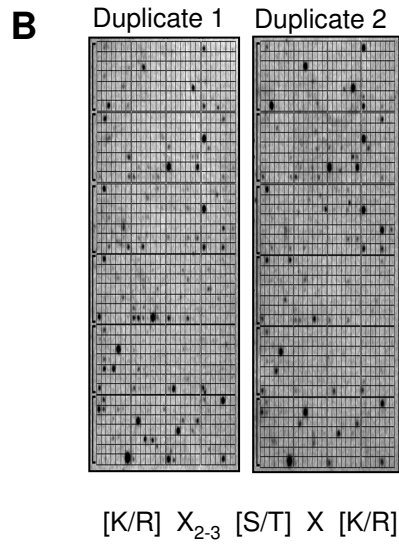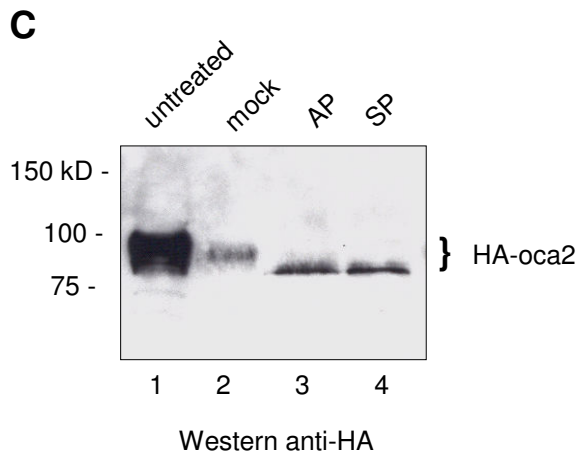

**Figure S2**

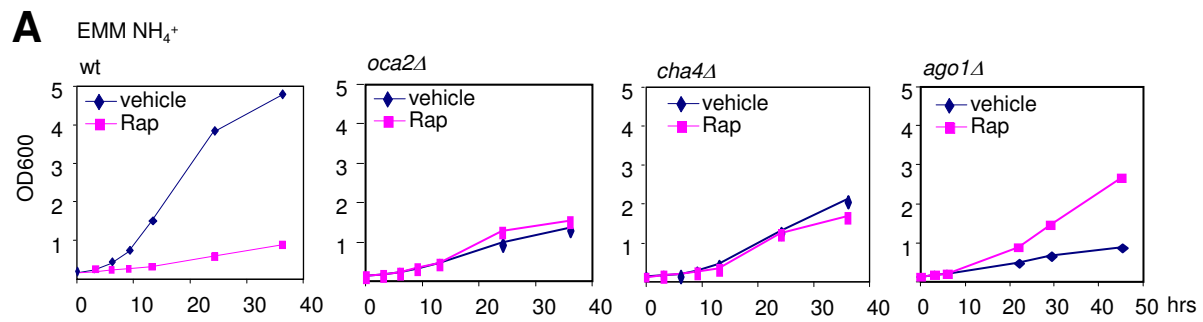

**B** Northern Blots

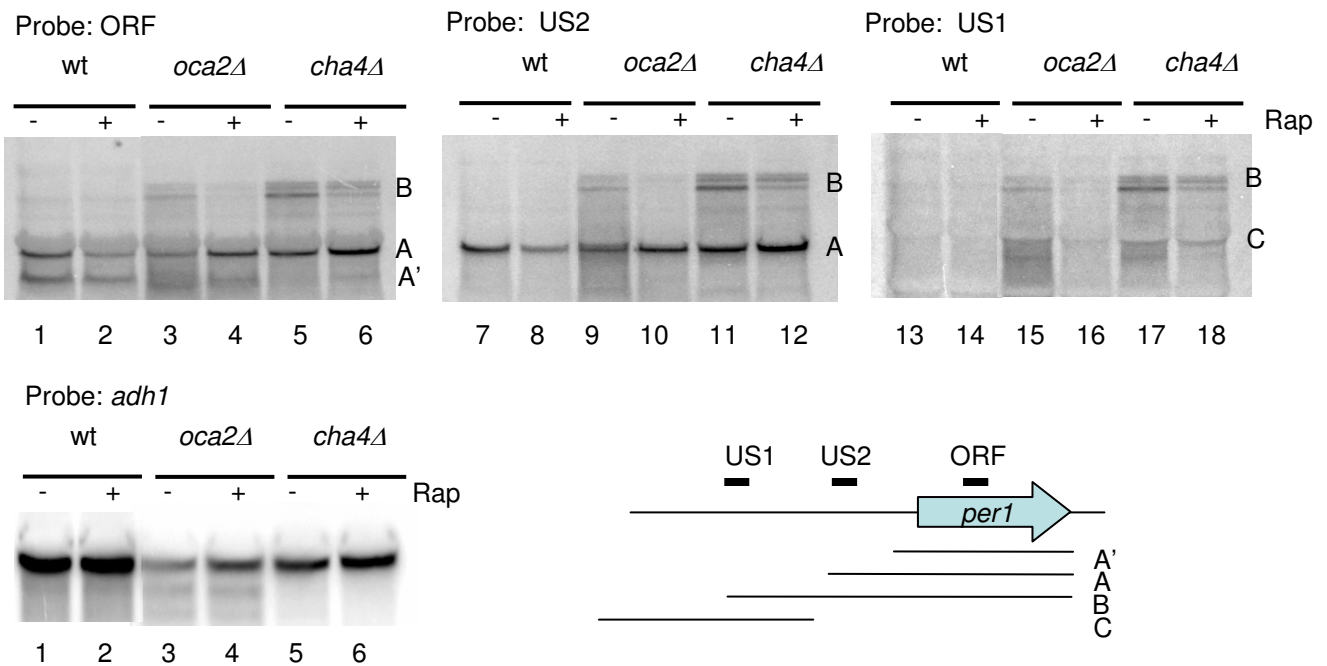

# Figure S3

**A**

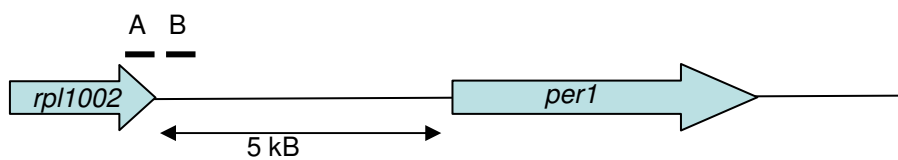

Probe: *rpl1002* A

| wt                           |     | <i>oca2Δ</i>                 |     |
|------------------------------|-----|------------------------------|-----|
| NH <sub>4</sub> <sup>+</sup> | Pro | NH <sub>4</sub> <sup>+</sup> | Pro |
|                              |     |                              |     |

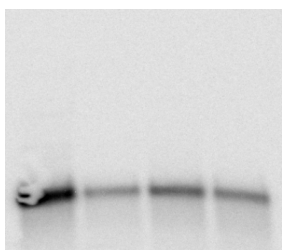

Probe: *rpl1002* B

| wt                           |     | <i>oca2Δ</i>                 |     |
|------------------------------|-----|------------------------------|-----|
| NH <sub>4</sub> <sup>+</sup> | Pro | NH <sub>4</sub> <sup>+</sup> | Pro |
|                              |     |                              |     |

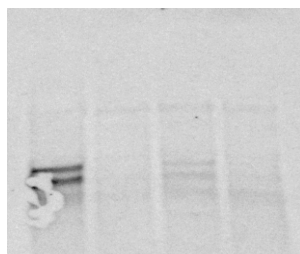

Probe: *adh1*

| wt                           |     | <i>oca2Δ</i>                 |     |
|------------------------------|-----|------------------------------|-----|
| NH <sub>4</sub> <sup>+</sup> | Pro | NH <sub>4</sub> <sup>+</sup> | Pro |
|                              |     |                              |     |

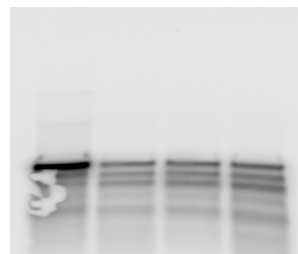

# Figure S4

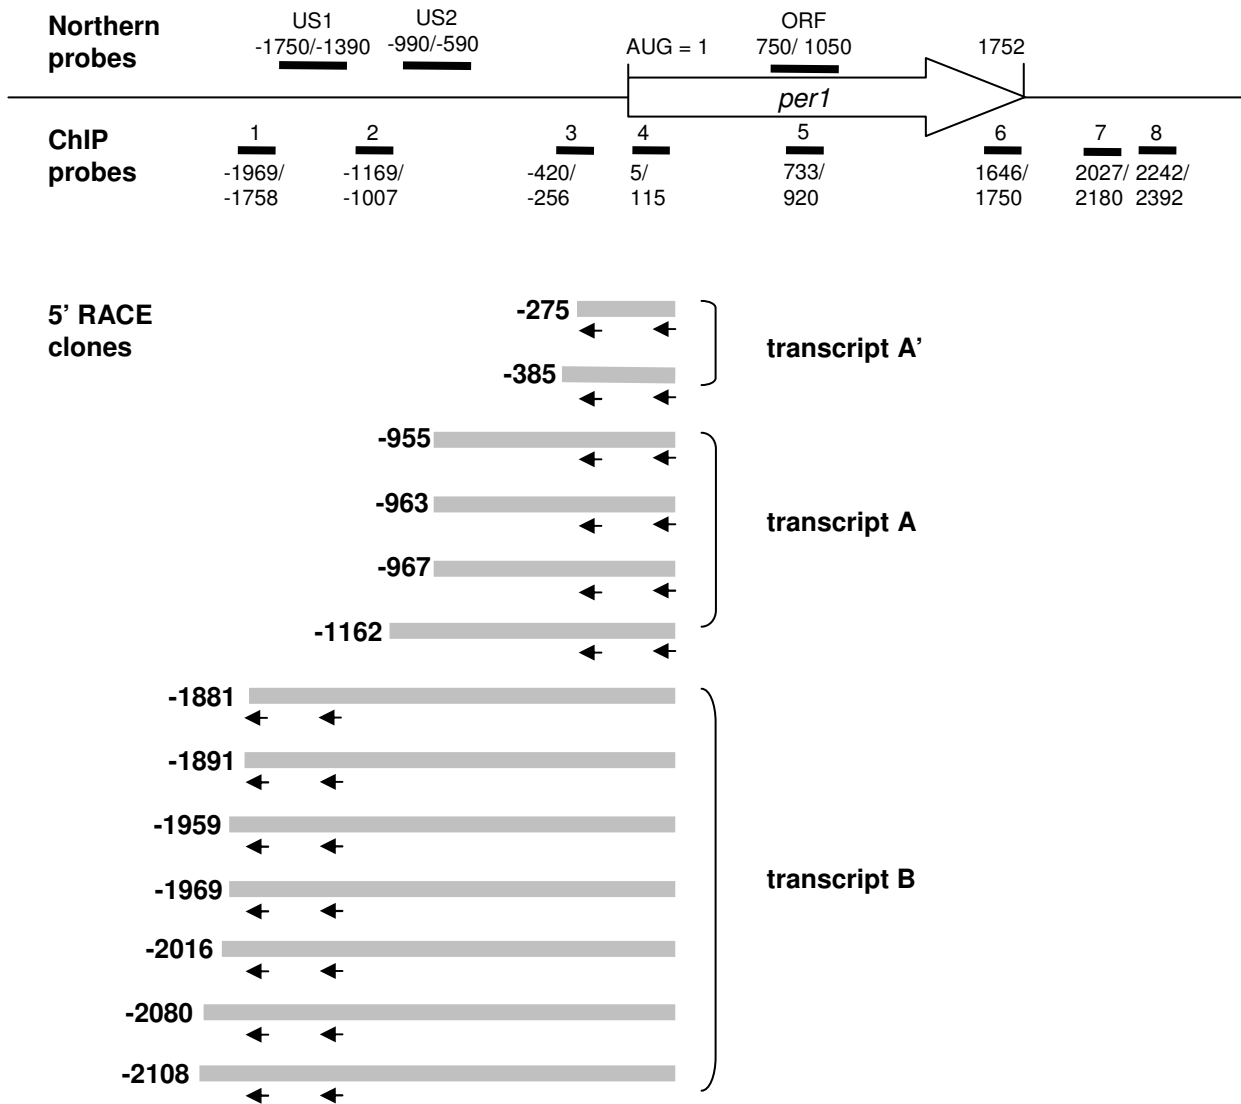

**Figure S5**

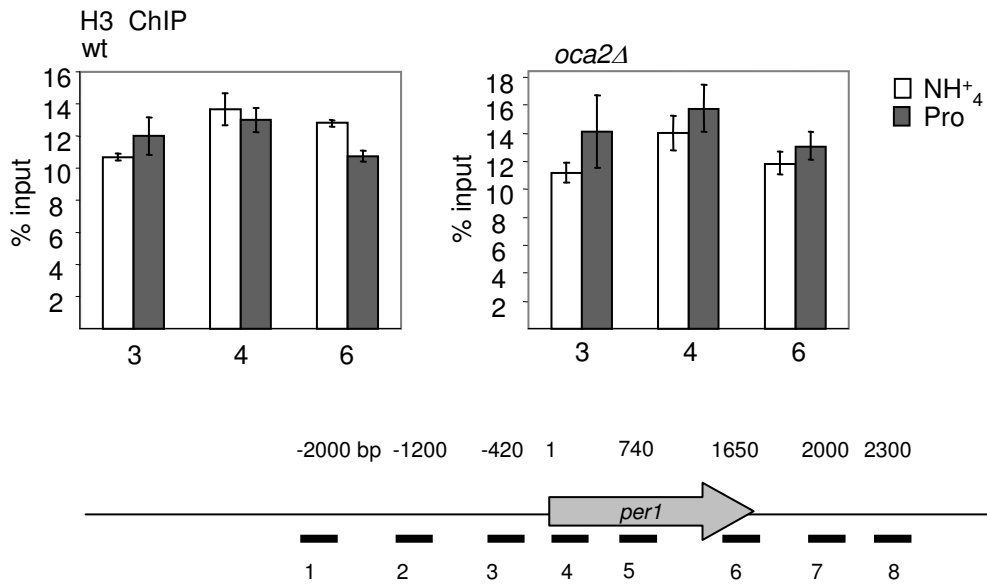

**Figure S6**

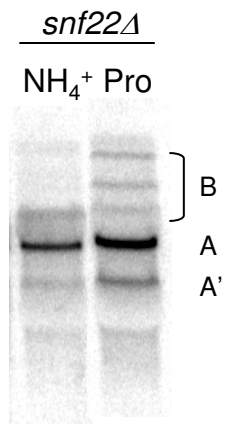

Supplement: supp_30_13_3396__1.pdf [file supp_30_13_3396__1.pdf]
